# Supplementary material for: Elicitation of Novel Trichogenic-Lipid Nanoemulsion Signaling Resistance Against Pearl Millet Downy Mildew Disease
Source: PubMed Central journal article supplement (PMC7022861; doi:10.3390/biom10010025), 2019-12-23
Supplement: biomolecules-10-00025-s001.pdf [file biomolecules-10-00025-s001.pdf]

## Supplementary Materials

# Elicitation of novel Trichogenic-lipid nanoemulsion signaling resistance against pearl millet downy mildew disease

Boregowda Nandini<sup>1</sup>, Hariprasad Puttaswamy<sup>2</sup>, Harischandra Sripathy Prakash<sup>1</sup>, Shivakanthkumar Adhikari<sup>3</sup>, Sudisha Jogaiyah<sup>3\*</sup> and Geetha Nagaraja<sup>1</sup>

<sup>1</sup> Department of Studies in Biotechnology, University of Mysore, Manasagangotri, Mysuru 570 006, Karnataka, India; bnanadini2010@gmail.com (N.B.); hasriprakash@gmail.com (H.S.P);

<sup>2</sup> Centre for Rural Development and Technology, Indian Institute of Technology Delhi, Hauz Khas, New Delhi 110016, India; phimprovement@rediffmail.com

<sup>3</sup> Laboratory of Plant Healthcare and Diagnostics, PG Department of Biotechnology and Microbiology, Karnataka University, Pavate Nagar, Dharwad 580 003, Karnataka, India; adhikarikr93@gmail.com

\* Correspondence: [jsudish@kud.ac.in](mailto:jsudish@kud.ac.in) (S.J.); [geetha@appbot.uni-mysore.ac.in](mailto:geetha@appbot.uni-mysore.ac.in) (G.N.); Tel.: +91-836-2779533 (S.J.); +91-0821-2419462 (G.N.); Fax: +91-836-2747884(S.J.)

**Fig. 1.** Specificity of qRT-PCR amplicons @ annealing temperature of 60°C.

**Fig. 2.** Amplification plot and Melt curve (T<sub>m</sub>) of specific target genes.

**Table 1.** Details of the reference genes and target genes

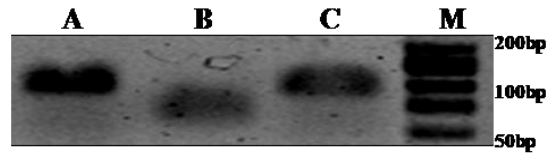

S. Fig. 1 Specificity of qRT-PCR amplicons @ annealing temperature of 60°C.

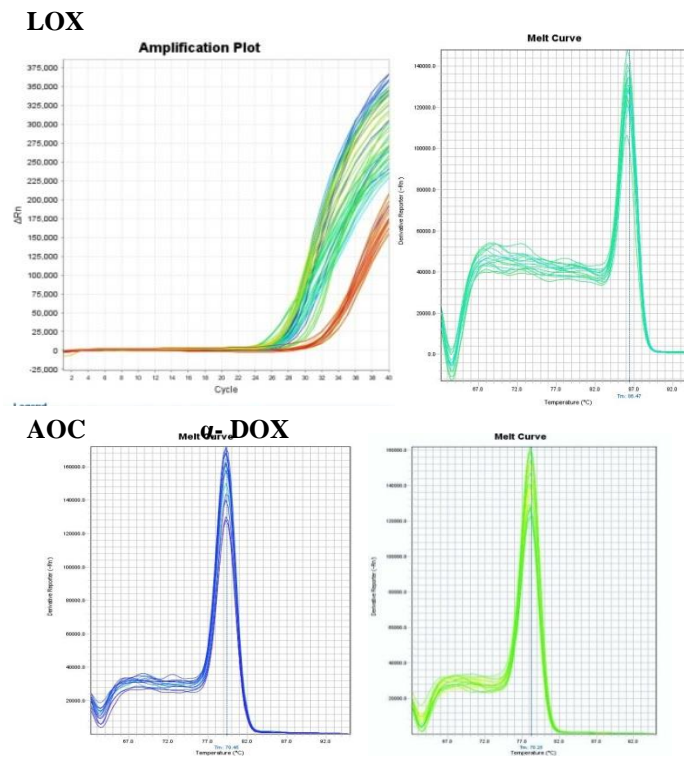

S. Fig.2. Amplification plot and Melt curve ( $T_m$ ) of specific target genes.

S. Table 1. Details of the reference genes and target genes

| Sl. No | Gene                                     | Gene symbol            | Primers (5'-3')                                         | Amplicon length(bp) |
|--------|------------------------------------------|------------------------|---------------------------------------------------------|---------------------|
| 1      | Glyceraldehyde-3-phosphate dehydrogenase | GAPDH (reference gene) | F - TGCCTTGCTCCCCTTGCTAA<br>R - CAGCCCTTCCACCTCTCCAG    | 139                 |
| 2      | Lipoxygenase                             | LOX                    | F – TTCGACTGGGAGGTGGAGAA<br>R - GGTACGTATCGTTGGAGAAG    | 159                 |
| 3      | Allene oxide cyclase                     | AOC                    | F – TACGGCCAGGTCAAGCTCAA<br>R<br>TGGTGTAGTTGTCGAGGGATGC | 184                 |
| 4      | $\alpha$ -Dioxygenase                    | $\alpha$ -DOX          | F – ATCCTGCTGCGTCCAAGTTT<br>R - ACAATCACGCCAGAAACGA     | 168                 |
